# Supplementary material for: Reduction in O-GlcNAcylation Mitigates the Severity of Inflammatory Response in Cerulein-Induced Acute Pancreatitis in a Mouse Model
Source: MDPI journal article supplement (doi:10.3390/biology11030347), 2022-02-22
Supplement: s1 [file s1]

Fig 1B

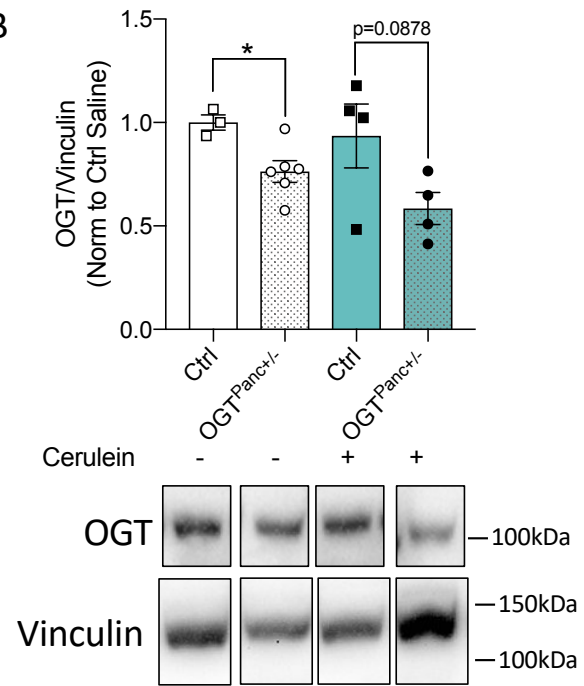

Raw

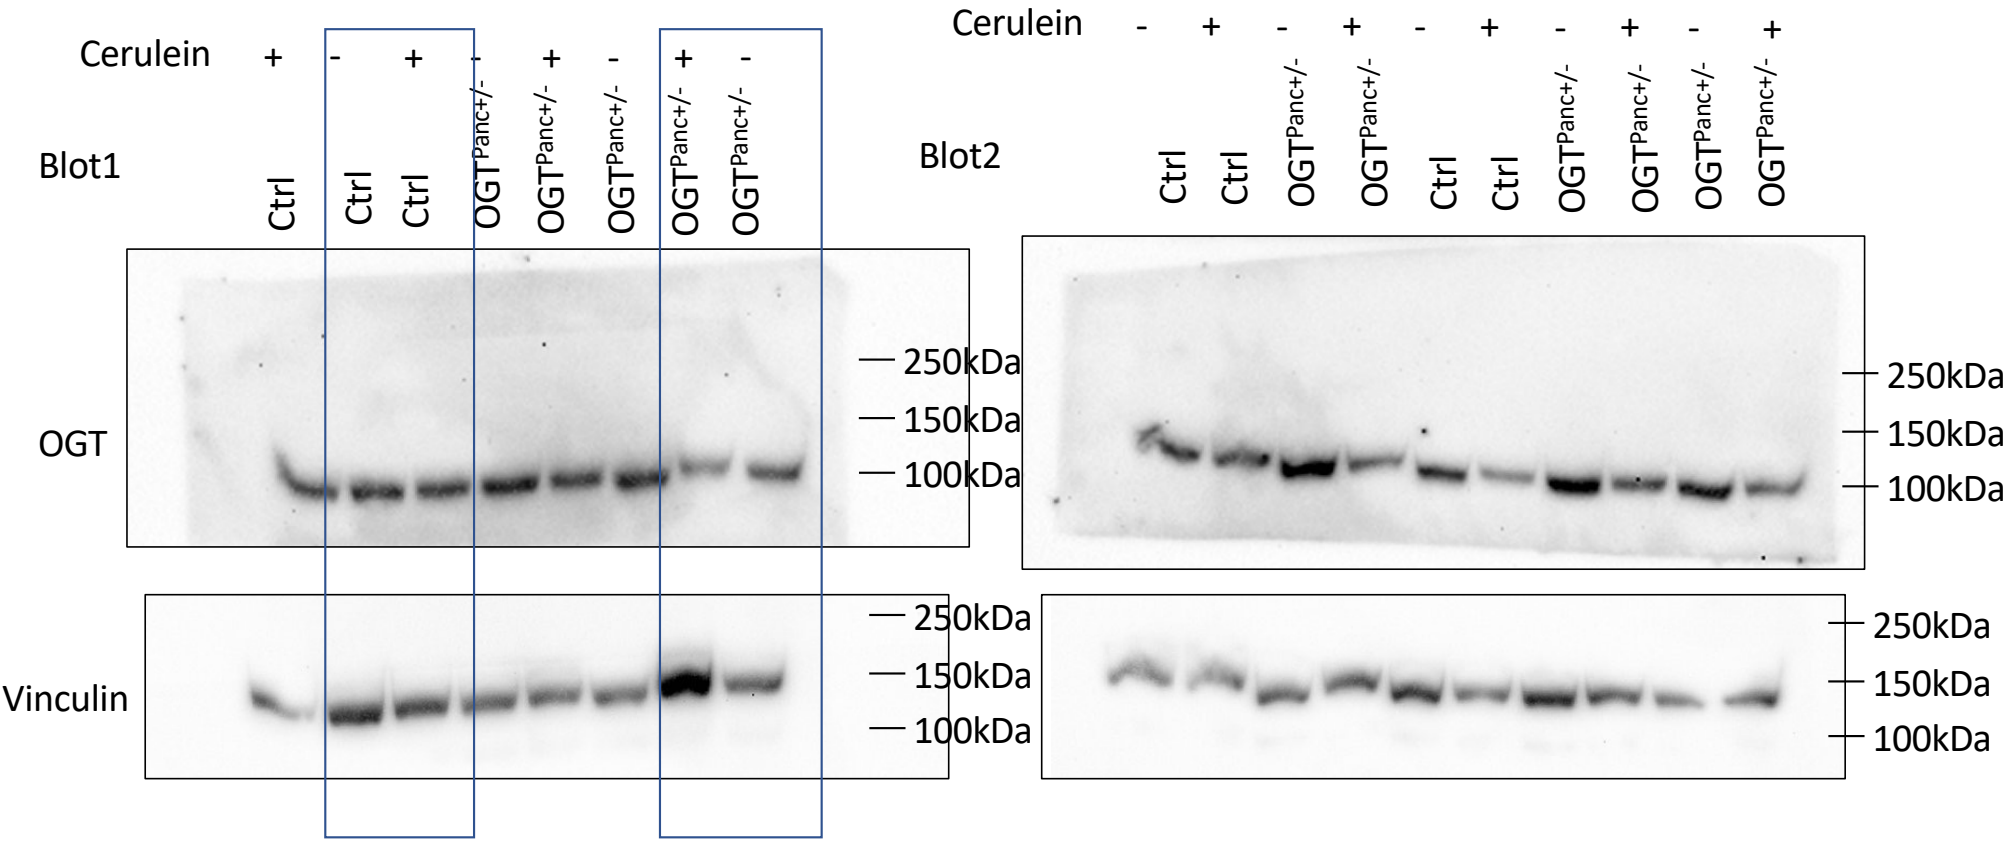

# Quantification

| Blot 1 |        |          |               |                    |                     |                           |  |
|--------|--------|----------|---------------|--------------------|---------------------|---------------------------|--|
| Lane   |        |          | OGT Intensity | Vinculin intensity | OGT/Vinculin        | Normalized to Ctrl Saline |  |
| 2      | Ctrl   | Saline   | 46.99         | 86.1               | 0.545600204         | 1                         |  |
|        |        |          |               |                    | Avg. WT 0.545600204 |                           |  |
| 1      | Ctrl   | Cerulein | 46.07         | 71.7               | 0.642571233         | 1.177732758               |  |
| 3      | Ctrl   | Cerulein | 43.44         | 75.3               | 0.576787232         | 1.057160953               |  |
| 4      | OgtHET | Saline   | 35.85         | 86.2               | 0.415970482         | 0.762408955               |  |
| 6      | OgtHET | Saline   | 37.97         | 71.8               | 0.528759645         | 0.969133883               |  |
| 8      | OgtHET | Saline   | 29.13         | 68.8               | 0.423388328         | 0.776004709               |  |
| 5      | OgtHET | Cerulein | 41.35         | 61.9               | 0.667937452         | 1.224225076               |  |
| 7      | OgtHET | Cerulein | 28.57         | 127                | 0.225393895         | 0.413111823               |  |
|        |        |          |               |                    |                     |                           |  |
| Blot 2 |        |          |               |                    |                     |                           |  |
| Lane   |        |          | OGT           | Vinculin           | OGT/Vinc            | Norm to Ctrl Saline       |  |
| 1      | Ctrl   | Saline   | 42.33         | 46.9               | 0.903386901         | 1.063784072               |  |
| 5      | Ctrl   | Saline   | 55.55         | 69.9               | 0.795053459         | 0.936215928               |  |
|        |        |          |               |                    | Avg. WT 0.84922018  |                           |  |
| 2      | Ctrl   | Cerulein | 39.14         | 45.1               | 0.868696733         | 1.022934633               |  |
| 6      | Ctrl   | Cerulein | 19.18         | 46.7               | 0.410798424         | 0.48373606                |  |
| 3      | OgtHET | Saline   | 42.43         | 63.5               | 0.668225771         | 0.786869868               |  |
| 7      | OgtHET | Saline   | 35.88         | 73.4               | 0.488655245         | 0.575416431               |  |
| 9      | OgtHET | Saline   | 37.94         | 63.1               | 0.601162938         | 0.707899968               |  |
| 4      | OgtHET | Cerulein | 24.8          | 57.3               | 0.432654058         | 0.509472182               |  |
| 8      | OgtHET | Cerulein | 35.2          | 54.2               | 0.64970187          | 0.765057032               |  |
| 10     | OgtHET | Cerulein | 24.97         | 45.3               | 0.55080839          | 0.648604924               |  |
